# Supplementary material
Source: publisher figshare collection journal article supplement (https://asha.figshare.com/articles/dataset/_/20289195)
Supplement: Supplementary file 1 [file 1]

### Supplemental Material S3. Characteristics of studies without compelling or promising evidence.

| Study                                   | Country/Territory | Study Type | Number of Study Groups | Caregiver-Child Language Intervention Name                                                                                                                                 |
|-----------------------------------------|-------------------|------------|------------------------|----------------------------------------------------------------------------------------------------------------------------------------------------------------------------|
| <b>0 through 11 months</b>              |                   |            |                        |                                                                                                                                                                            |
| <b>Developmental Disorder</b>           |                   |            |                        |                                                                                                                                                                            |
| <b>Barrera et al., 1987</b>             | Canada            | Non-RCT    | 2                      | a. Home Responsive Intervention                                                                                                                                            |
| <b>12 through 23 months</b>             |                   |            |                        |                                                                                                                                                                            |
| <b>Language Delay/Disorder</b>          |                   |            |                        |                                                                                                                                                                            |
| <b>Armstrong, 1998</b>                  | Canada            | Non-RCT    | 1                      | a. Storybooks to Literacy                                                                                                                                                  |
| <b>Bigelow et al., 2020</b>             | USA               | RCT        | 2                      | a. Promoting Communication Tools for Advancing Language in Kids with Text Messaging<br>b. Promoting Communication Tools for Advancing Language in Kids with Text Messaging |
| <b>Wake et al., 2011</b>                | Australia         | RCT        | 2                      | a. You Make the Difference                                                                                                                                                 |
| <b>24 through 35 months</b>             |                   |            |                        |                                                                                                                                                                            |
| <b>Language Delay/Disorder</b>          |                   |            |                        |                                                                                                                                                                            |
| <b>Boyce et al., 2017</b>               | USA               | RCT        | 2                      | a. Family-Centered Bookmaking                                                                                                                                              |
| <b>Tsybina &amp; Eriks-Brophy, 2010</b> | Canada            | Non-RCT    | 2                      | a. Bilingual Dialogic Book-Reading Intervention                                                                                                                            |
| <b>36 through 48 months</b>             |                   |            |                        |                                                                                                                                                                            |
| <b>Autism</b>                           |                   |            |                        |                                                                                                                                                                            |
| <b>Gengoux et al., 2019</b>             | USA               | SG         | 1                      | a. Developmental Reciprocity Treatment                                                                                                                                     |
| <b>McConachie et al., 2005</b>          | UK                | Non-RCT    | 2                      | a. Hanen More Than Words                                                                                                                                                   |
| <b>Meaden et al., 2020</b>              | USA               | SG         | 1                      | a. Parent-implemented Communication Strategies                                                                                                                             |
| <b>Stadnick et al., 2015</b>            | USA               | Non-RCT    | 2                      | a. Project ImPACT                                                                                                                                                          |
| <b>Language Delay/Disorder</b>          |                   |            |                        |                                                                                                                                                                            |
| <b>Towson &amp; Gallagher, 2014</b>     | USA               | RCT        | 2                      | a. Read Together, Talk Together                                                                                                                                            |

Note. RCT = randomized control trial; SG = single group
