# Supplementary material
Source: publisher figshare collection journal article supplement (https://asha.figshare.com/articles/dataset/_/20289195)
Supplement: Supplementary file 2 [file 1]

**Supplemental Material S5.** Summary of intervention trainer, language, location, and dosage for groups in studies without compelling or promising evidence.

| Study                        | Caregiver-Child Language Intervention Name                                          | Intervention Trainer         | Language of Instruction | Intervention Location                  | Dosage             |                                       |                          |                       |
|------------------------------|-------------------------------------------------------------------------------------|------------------------------|-------------------------|----------------------------------------|--------------------|---------------------------------------|--------------------------|-----------------------|
|                              |                                                                                     |                              |                         |                                        | Number of Sessions | Session Length                        | Duration of Intervention | Frequency of Sessions |
| 0 through 11 months          |                                                                                     |                              |                         |                                        |                    |                                       |                          |                       |
| Developmental Disorder       |                                                                                     |                              |                         |                                        |                    |                                       |                          |                       |
| Barrera et al., 1987         | a. Home Responsive Intervention                                                     | -                            | -                       | Home                                   | -                  | 1-2 hr                                | 20 mo                    | Weekly or Biweekly    |
| 12 through 23 months         |                                                                                     |                              |                         |                                        |                    |                                       |                          |                       |
| Language Delay/Disorder      |                                                                                     |                              |                         |                                        |                    |                                       |                          |                       |
| Armstrong, 1998              | a. Storybooks to Literacy                                                           | Researcher                   | English                 | Early Childhood Education Setting      | -                  | -                                     | 8 wk                     | -                     |
| Bigelow et al., 2020         | a. Promoting Communication Tools for Advancing Language in Kids with Text Messaging | Home Visitor                 | English; Spanish        | Home                                   | -                  | 90 min                                | 7.67/mo                  | Weekly or Bi-weekly   |
|                              | b. Promoting Communication Tools for Advancing Language in Kids with Text Messaging | Home Visitor                 | English; Spanish        | Home                                   | -                  | 1.5 hr                                | 7.35/mo                  | Weekly or Bi-weekly   |
| Wake et al., 2011            | a. You Make the Difference                                                          | Trained Interventionist      | English                 | Community Center                       | 6                  | 2 hr                                  | 6 wk                     | Weekly                |
| 24 through 35 months         |                                                                                     |                              |                         |                                        |                    |                                       |                          |                       |
| Language Delay/Disorder      |                                                                                     |                              |                         |                                        |                    |                                       |                          |                       |
| Boyce et al., 2017           | a. Family-Centered Bookmaking                                                       | Early Intervention Provider  | English                 | Home                                   | 2-6                | -                                     | 8.42 mo                  | -                     |
| Tsybina & Eriks-Brophy, 2010 | a. Bilingual Dialogic Book-Reading Intervention                                     | Researcher                   | English                 | Home                                   | 7                  | First Session: 30 min; Others: 15 min | 6 wk                     | Weekly                |
| 36 through 48 months         |                                                                                     |                              |                         |                                        |                    |                                       |                          |                       |
| Autism                       |                                                                                     |                              |                         |                                        |                    |                                       |                          |                       |
| Gengoux et al., 2019         | a. Developmental Reciprocity Treatment                                              | Trained Interventionist      | English                 | Clinic                                 | 12                 | 1.5 hr                                | 12 wk                    | Weekly                |
| McConachie et al., 2005      | a. Hanen More Than Words                                                            | Trained Course Leaders       | English                 | Unspecified Group Location; Home Local | Group: 12; Home: 3 | -                                     | 3 mo                     | Weekly                |
| Meaden et al., 2020          | a. Parent-implemented Communication Strategies                                      | Researcher; Graduate Student | Spanish                 | Community Building                     | 4                  | 20 min                                | -                        | -                     |
| Stadnick et al., 2015        | a. Project ImPACT                                                                   | Trained Interventionist      | English                 | -                                      | 12                 | 1 hr                                  | 12 wk                    | Weekly                |

| <b>Language Delay/Disorder</b>      |                                 |   |                     |                                            |   |        |      |   |
|-------------------------------------|---------------------------------|---|---------------------|--------------------------------------------|---|--------|------|---|
| <b>Towson &amp; Gallagher, 2014</b> | a. Read Together, Talk Together | - | English;<br>Spanish | Early<br>Childhood<br>Education<br>Setting | 1 | 30 min | 5 wk | - |
