# Supplementary material
Source: publisher figshare collection journal article supplement (https://asha.figshare.com/articles/dataset/_/20289195)
Supplement: Supplementary file 3 [file 1]

**Supplemental Material S7.** Number of caregiver outcomes rated as providing lacking evidence according to measure domain for studies with a group without promising or compelling evidence.

| Study                        | Targeted Treatment (TT) and Treatment Comparison (TC) or Other Comparison (OC)<br>Study Groups | Outcome Measure Type |     |    |    |
|------------------------------|------------------------------------------------------------------------------------------------|----------------------|-----|----|----|
|                              |                                                                                                | NV                   | SLI | GL | IN |
| <i>0 through 11 months</i>   |                                                                                                |                      |     |    |    |
| Developmental Disorder       |                                                                                                |                      |     |    |    |
| Barrera et al., 1987         | Home Responsive Intervention (TT)                                                              |                      |     | 3  |    |
|                              | Typical Development (OC)                                                                       |                      |     |    |    |
| <i>12 through 23 months</i>  |                                                                                                |                      |     |    |    |
| Language Delay/Disorder      |                                                                                                |                      |     |    |    |
| Armstrong, 1998              | Storybooks to Literacy (TT)                                                                    |                      |     | 2  |    |
| Bigelow et al., 2020         | Promoting Communication Tools for Advancing Language in Kids with Text Messaging (TT)          |                      |     | 1  |    |
|                              | Promoting Communication Tools for Advancing Language in Kids with Text Messaging (TC)          |                      |     |    |    |
| Wake et al., 2011            | You Make the Difference (TT)                                                                   |                      |     | 2  |    |
|                              | Business as Usual (OC)                                                                         |                      |     |    |    |
|                              | Follow-up (12-14 weeks)                                                                        |                      |     | -  |    |
|                              | Follow-up (1 year)                                                                             |                      |     | -  |    |
| <i>24 through 35 months</i>  |                                                                                                |                      |     |    |    |
| Language Delay/Disorder      |                                                                                                |                      |     |    |    |
| Boyce et al., 2017           | Family-Centered Bookmaking (TT)                                                                |                      |     | 1  |    |
|                              | Business as Usual (OC)                                                                         |                      |     |    |    |
| Tsybina & Eriks-Brophy, 2010 | Bilingual Dialogic Book-Reading Intervention (TT)                                              |                      |     | 1  |    |
|                              | Delayed Treatment (OC)                                                                         |                      |     |    |    |
|                              | Follow-up (6 weeks)                                                                            |                      |     | -  |    |
| <i>36 through 48 months</i>  |                                                                                                |                      |     |    |    |
| Autism                       |                                                                                                |                      |     |    |    |
| Gengoux et al., 2019         | Developmental Reciprocity Treatment (TT)                                                       |                      |     | 1  |    |
| McConachie et al., 2005      | Hanen More Than Words (TT)                                                                     |                      |     | 1  |    |
|                              | Delayed Treatment (OC)                                                                         |                      |     |    |    |
| Meaden et al. 2020           | Parent-implemented Communication Strategies (PiCS) (TT)                                        |                      |     |    | 3  |
| Stadnick et al., 2015        | Project ImPACT (TT)                                                                            |                      |     | 1  |    |
|                              | Business as Usual (OC)                                                                         |                      |     |    |    |
| Language Delay/Disorder      |                                                                                                |                      |     |    |    |
| Towson & Gallagher, 2014     | Read Together, Talk Together (TT)                                                              |                      |     | 3  |    |
|                              | Business as Usual (OC)                                                                         |                      |     |    |    |

*Note.* NV = Nonverbal Communication; SLI = Language Input; GL = Global. IN = Interactional
