# Supplementary material
Source: publisher figshare collection journal article supplement (https://asha.figshare.com/articles/dataset/_/20289195)
Supplement: Supplementary file 4 [file 1]

**Supplemental Material S8.** Number of child outcomes for each study with caregiver outcomes rated as providing lacking evidence according to measure domain for studies with a group without promising or compelling evidence.

| Study                        | Targeted Treatment (TT) and Treatment Comparison (TC) or Other Comparison (OC) Study Groups | Evidence Level and Outcome Domain |    |     |    |           |    |     |    |         |    |     |    |
|------------------------------|---------------------------------------------------------------------------------------------|-----------------------------------|----|-----|----|-----------|----|-----|----|---------|----|-----|----|
|                              |                                                                                             | Compelling                        |    |     |    | Promising |    |     |    | Lacking |    |     |    |
|                              |                                                                                             | EX                                | RE | S/P | GL | EX        | RE | S/P | GL | EX      | RE | S/P | GL |
| 12 through 23 months         |                                                                                             |                                   |    |     |    |           |    |     |    |         |    |     |    |
| Language Delay/Disorder      |                                                                                             |                                   |    |     |    |           |    |     |    |         |    |     |    |
| Bigelow et al., 2020         | Promoting Communication Tools for Advancing Language in Kids with Text Messaging (TT)       |                                   |    |     |    |           |    |     |    | 3       | 1  |     |    |
| Tsybina & Eriks-Brophy, 2010 | Promoting Communication Tools for Advancing Language in Kids with Text Messaging (TC)       |                                   |    |     |    |           |    |     |    |         |    |     |    |
|                              | Bilingual Dialogic Book-Reading Intervention (TT)                                           | 2                                 |    |     |    | 1         |    |     |    | 1       |    |     |    |
|                              | Delayed Treatment (OC)                                                                      |                                   |    |     |    |           |    |     |    |         |    |     |    |
|                              | Follow-up (6 weeks)                                                                         | 2/2                               |    |     |    | -         |    |     |    | -       |    |     |    |
| Wake et al., 2011            | You Make the Difference (TT)                                                                |                                   |    |     |    |           |    |     |    | 3       |    |     |    |
|                              | Business as Usual (OC)                                                                      |                                   |    |     |    |           |    |     |    |         |    |     |    |
|                              | Follow-up (12-14 weeks)                                                                     |                                   |    |     |    |           |    |     |    | 3/3     |    |     |    |
|                              | Follow-up (1 year)                                                                          |                                   |    |     |    |           |    |     |    | 3/3     |    |     |    |
| 24 through 35 months         |                                                                                             |                                   |    |     |    |           |    |     |    |         |    |     |    |
| Language Delay/Disorder      |                                                                                             |                                   |    |     |    |           |    |     |    |         |    |     |    |
| Tsybina & Eriks-Brophy, 2010 | Bilingual Dialogic Book-Reading Intervention (TT)                                           | 2                                 |    |     |    | 1         |    |     |    | 1       |    |     |    |
|                              | Delayed Treatment (OC)                                                                      |                                   |    |     |    |           |    |     |    |         |    |     |    |
|                              | Follow-up (6 weeks)                                                                         | 2/2                               |    |     |    | -         |    |     |    | -       |    |     |    |
| 36 through 48 months         |                                                                                             |                                   |    |     |    |           |    |     |    |         |    |     |    |
| Autism                       |                                                                                             |                                   |    |     |    |           |    |     |    |         |    |     |    |
| Gengoux et al., 2019         | Developmental Reciprocity Treatment (TT)                                                    | 1                                 |    | 3   |    | 2         | 1  |     |    |         |    |     |    |
| McConachie et al., 2005      | Hanen More Than Words (TT)                                                                  | 1                                 |    |     |    |           |    |     |    |         |    | 1   |    |
|                              | Delayed Treatment (OC)                                                                      |                                   |    |     |    |           |    |     |    |         |    |     |    |
| Stadnick et al., 2015        | Project ImPACT (TT)                                                                         |                                   |    |     | 1  |           |    |     |    |         |    | 1   |    |

|                          |                                   |   |     |
|--------------------------|-----------------------------------|---|-----|
|                          | Business as Usual (OC)            |   |     |
|                          | <b>Language Delay/Disorder</b>    |   |     |
| Towson & Gallagher, 2014 | Read Together, Talk Together (TT) | 1 | 1 3 |
|                          | Business as Usual (OC)            |   |     |

*Note.* Only studies where the language intervention group had promising, or compelling evidence are included in the table. EX = expressive. RE = Receptive. S/P = social/pragmatic. GL = global (receptive & expressive). LI = language impairment. TD = typical development. \*Denotes language intervention groups without evidence ratings included in syntheses. For studies with a follow-up, the denominator represents the total number of outcomes assessed at follow-up for a given outcome category. <sup>+</sup> Indicates a significant positive change at follow-up. <sup>-</sup> Indicates significant negative change at follow-up
