# Supplementary material
Source: publisher figshare collection journal article supplement (https://asha.figshare.com/articles/dataset/_/20289195)
Supplement: Supplementary file 6 [file 1]

**Supplemental Material S6.** Summary of instruction format, key intervention strategies taught and information provided to caregivers, and intervention contexts for groups in studies without compelling or promising evidence.

| Study                          | Caregiver-Child Language Intervention Name                                          | Intervention Characteristics | Instruction Format                    | Key Intervention Strategies Taught (S)/ Information Provided (I) to Caregivers                                                                                                                                                                                                                                                                                                                                                                                                                                                                   | Child Intervention Context     |
|--------------------------------|-------------------------------------------------------------------------------------|------------------------------|---------------------------------------|--------------------------------------------------------------------------------------------------------------------------------------------------------------------------------------------------------------------------------------------------------------------------------------------------------------------------------------------------------------------------------------------------------------------------------------------------------------------------------------------------------------------------------------------------|--------------------------------|
| <i>0 through 11 months</i>     |                                                                                     |                              |                                       |                                                                                                                                                                                                                                                                                                                                                                                                                                                                                                                                                  |                                |
| <b>Developmental Disorder</b>  |                                                                                     |                              |                                       |                                                                                                                                                                                                                                                                                                                                                                                                                                                                                                                                                  |                                |
| <b>Barrera et al., 1987</b>    | a. Home Responsive Intervention                                                     | Developmental                | One-on-one: In-person                 | <ul style="list-style-type: none"> <li>• (S) respond appropriately to infant's cues</li> <li>• (S) develop activities to encourage development</li> <li>• (I) emotional support</li> <li>• (I) information about child development</li> </ul>                                                                                                                                                                                                                                                                                                    | -                              |
| <i>12 through 23 months</i>    |                                                                                     |                              |                                       |                                                                                                                                                                                                                                                                                                                                                                                                                                                                                                                                                  |                                |
| <b>Language Delay/Disorder</b> |                                                                                     |                              |                                       |                                                                                                                                                                                                                                                                                                                                                                                                                                                                                                                                                  |                                |
| <b>Armstrong, 1998</b>         | a. Storybooks to Literacy                                                           | Developmental                | Mixed: In-person                      | <ul style="list-style-type: none"> <li>• (S) reading when the child is comfortable and willing</li> <li>• (S) using voice to make reading exciting</li> <li>• (S) allowing child to participate such as through turning pages</li> <li>• (S) being responsive to child's attempts to listen, gesture, or talk about the book</li> <li>• (S) use of language facilitation strategies: expansions, open-ended questions, and responsiveness</li> <li>• (S) avoid use of straight reading and questions that can be answered by pointing</li> </ul> | Shared Book Reading            |
| <b>Bigelow et al., 2020</b>    | a. Promoting Communication Tools for Advancing Language in Kids with Text Messaging | NDBI                         | One-on-one: In-person;<br>Text/Emails | <ul style="list-style-type: none"> <li>• (I) benefits of shared reading</li> <li>• (S) following child's lead/responsiveness</li> <li>• (S) commenting and labeling</li> <li>• (S) imitating and expanding</li> <li>• (S) asking open-ended questions</li> <li>• (S) giving praise and positive attention</li> <li>• (S) providing choices</li> <li>• (S) time delay/fill-in-the-blank</li> <li>• (S) environmental arrangement</li> <li>• (S) using of strategies during daily routines</li> </ul>                                              | Familiar Activities & Routines |
|                                | b. Promoting Communication Tools for Advancing Language in Kids with Text Messaging | NDBI                         | One-on-one: In-person                 | <ul style="list-style-type: none"> <li>• (S) following child's lead/responsiveness</li> <li>• (S) commenting and labeling</li> <li>• (S) imitating and expanding</li> <li>• (S) asking open-ended questions</li> <li>• (S) giving praise and positive attention</li> <li>• (S) providing choices</li> <li>• (S) time delay/fill-in-the-blank</li> <li>• (S) environmental arrangement</li> <li>• (S) using of strategies during daily routines</li> </ul>                                                                                        | Familiar Activities & Routines |
| <b>Wake et al., 2011</b>       | a. You Make the Difference                                                          | Developmental                | Mixed: In-person                      | <ul style="list-style-type: none"> <li>• (S) follow child's interests</li> <li>• (S) strategies to sustain interactions</li> <li>• (S) extending information</li> <li>• (S) increasing language/words used</li> </ul>                                                                                                                                                                                                                                                                                                                            | Play Routines;                 |

|                                         |                                                 |               |                       |                                                                                                                                                                                                                                                                                                                                                                                                                                                                                                                                                                                                                                                                                                                                                                                                                                                            |                                 |
|-----------------------------------------|-------------------------------------------------|---------------|-----------------------|------------------------------------------------------------------------------------------------------------------------------------------------------------------------------------------------------------------------------------------------------------------------------------------------------------------------------------------------------------------------------------------------------------------------------------------------------------------------------------------------------------------------------------------------------------------------------------------------------------------------------------------------------------------------------------------------------------------------------------------------------------------------------------------------------------------------------------------------------------|---------------------------------|
|                                         |                                                 |               |                       | <ul style="list-style-type: none"> <li>• (S) use strategies in everyday play</li> <li>• (S) use strategies during book reading</li> </ul>                                                                                                                                                                                                                                                                                                                                                                                                                                                                                                                                                                                                                                                                                                                  | Shared Book Reading             |
| <b>24 through 35 months</b>             |                                                 |               |                       |                                                                                                                                                                                                                                                                                                                                                                                                                                                                                                                                                                                                                                                                                                                                                                                                                                                            |                                 |
| <b>Language Delay/Disorder</b>          |                                                 |               |                       |                                                                                                                                                                                                                                                                                                                                                                                                                                                                                                                                                                                                                                                                                                                                                                                                                                                            |                                 |
| <b>Boyce et al., 2017</b>               | a. Family-Centered Bookmaking                   | Developmental | One-on-one: In-person | <ul style="list-style-type: none"> <li>• (S) generate book topics from daily routines</li> <li>• (S) have conversation, communication, and interest in the book topic</li> <li>• (S) illustrate story by taking and printing digital photographs</li> <li>• (S) write captions from words, signs, gestures, or child interest in narrative</li> <li>• (S) involve the child in organizing and making the book</li> <li>• (S) read and look at book with child</li> <li>• (S) re-reading book</li> </ul>                                                                                                                                                                                                                                                                                                                                                    | Book Making                     |
| <b>Tsybina &amp; Eriks-Brophy, 2010</b> | a. Bilingual Dialogic Book-Reading Intervention | NDBI          | One-on-one: In-person | <ul style="list-style-type: none"> <li>• (S) establishing joint attention to the picture of a target word</li> <li>• (S) use of prompting</li> <li>• (S) use of modeling</li> <li>• (S) use of recasts</li> <li>• (S) providing praise</li> </ul>                                                                                                                                                                                                                                                                                                                                                                                                                                                                                                                                                                                                          | Shared Book Reading             |
| <b>36 through 48 months</b>             |                                                 |               |                       |                                                                                                                                                                                                                                                                                                                                                                                                                                                                                                                                                                                                                                                                                                                                                                                                                                                            |                                 |
| <b>Autism</b>                           |                                                 |               |                       |                                                                                                                                                                                                                                                                                                                                                                                                                                                                                                                                                                                                                                                                                                                                                                                                                                                            |                                 |
| <b>Gengoux et al., 2019</b>             | a. Developmental Reciprocity Treatment          | Developmental | One-on-one: In-person | <ul style="list-style-type: none"> <li>• (S) following the child’s interest</li> <li>• (S) responding to preintentional and unconventional communication attempts</li> <li>• (S) emphasizing affective sharing, and scaffolding communication and play</li> <li>• (S) enthusiastic, affectively rich interactive style to engage and respond to child</li> <li>• (S) clearly demonstrate what is expected from the child</li> <li>• (S) give adequate response time</li> <li>• (S) positively acknowledge all forms of child response</li> <li>• (S) be responsive to child’s sensory needs and acts in a predictable manner</li> <li>• (S) adjusting sensory environment</li> <li>• (S) responding to child’s sensory seeking behavior</li> <li>• (S) facilitative strategies with aim of increasing fun interactions between parent and child</li> </ul> | Play Routines                   |
| <b>McConachie et al., 2005</b>          | a. Hanen More Than Words                        | Developmental | Mixed: In-person      | <ul style="list-style-type: none"> <li>• (S) structure child’s environment to motivate them to communicate</li> <li>• (S) create structured routines with opportunities for child to initiate or respond</li> <li>• (S) use visual cues to aid child’s comprehension</li> <li>• (S) environmental arrangement</li> <li>• (S) modeling</li> <li>• (S) mand-model</li> <li>• (S) time delay</li> </ul>                                                                                                                                                                                                                                                                                                                                                                                                                                                       | Familiar Activities & Routines  |
| <b>Meaden et al., 2020</b>              | a. Parent-implemented Communication Strategies  | NDBI          | Mixed: In-person      | <ul style="list-style-type: none"> <li>• (S) develop reciprocity, social engagement, and shared affect during interactions</li> <li>• (S) direct prompting</li> </ul>                                                                                                                                                                                                                                                                                                                                                                                                                                                                                                                                                                                                                                                                                      | Familiar Activities & Routines  |
| <b>Stadnick et al., 2015</b>            | a. Project ImPACT                               | NDBI          | One-on-one: In-person |                                                                                                                                                                                                                                                                                                                                                                                                                                                                                                                                                                                                                                                                                                                                                                                                                                                            | Familiar Activities & Routines; |

|                                     |                                 |      |                                |                                                                                                                                                                                                                                                                                                                                                                                                                                                                                                                         |                     |
|-------------------------------------|---------------------------------|------|--------------------------------|-------------------------------------------------------------------------------------------------------------------------------------------------------------------------------------------------------------------------------------------------------------------------------------------------------------------------------------------------------------------------------------------------------------------------------------------------------------------------------------------------------------------------|---------------------|
|                                     |                                 |      |                                | <ul style="list-style-type: none"> <li>• (S) contingency reinforcement</li> <li>• (S) imitation</li> <li>• (S) play</li> </ul>                                                                                                                                                                                                                                                                                                                                                                                          | Play Routines       |
|                                     |                                 |      | <b>Language Delay/Disorder</b> |                                                                                                                                                                                                                                                                                                                                                                                                                                                                                                                         |                     |
| <b>Towson &amp; Gallagher, 2014</b> | a. Read Together, Talk Together | NDBI | Group: In-person               | <ul style="list-style-type: none"> <li>• (S) dialogic shared book reading strategies (CROWD): provide a blank for child to fill in at the end of a sentence; ask questions about the events or main idea in the story; ask open-ended questions; use Wh-questions; engage child in relating pictures and words in book to own experiences</li> <li>• (S) dialogic shared book reading strategies (PEER): prompt child to say something related to book; evaluate what child said; expand on response; repeat</li> </ul> | Shared Book Reading |

*Note.* Only studies where the language intervention group had lacking evidence are included in the table; ImPACT = Improving Parents as Communication Teachers; NDBI = naturalistic developmental behavioral intervention
