# Supplementary material
Source: publisher figshare collection journal article supplement (https://asha.figshare.com/articles/dataset/_/20289195)
Supplement: Supplementary file 7 [file 1]

**Supplemental Material S9.** Complete references for studies included in scoping review.

\*Studies that did not include caregiver language outcome measures with compelling or promising evidence

- Aldred, C., Green, J., & Adams, C. (2004). A new social communication intervention for children with autism: Pilot randomized controlled treatment study suggesting effectiveness. *Journal of Child Psychology and Psychiatry*, 45(8), 1420–1430. <https://doi.org/10.1111/j.1469-7610.2004.00338.x>
- Alquraini, T., Al-Odaib, A., Al-Dhalaan, H., Merza, H., & Mahoney, G. (2018). Feasibility of responsive teaching with mothers and young children with autism in Saudi Arabia. *Journal of Early Intervention*, 40(4), 304–316. <https://doi.org/10.1177/1053815118789176>
- \*Armstrong, M. B. (1998). Storybooks to literacy: A collaborative shared reading project. *Infant-Toddler Intervention*, 8(4), 365–375.
- \*Barrera, M. E., Watson, L. J., & Adelstein, A. (1987). Development of Down's syndrome infants with and without heart defects and changes in their caretaking environment. *Child: Care, Health and Development*, 13(2), 87–100. <https://doi.org/10.1111/j.1365-2214.1987.tb00526.x>
- Barrett, A. C., Vernon, T. W., McGarry, E. S., Holden, A. N., Bradshaw, J., Ko, J. A., ... & German, T. C. (2020). Social responsiveness and language use associated with an enhanced PRT approach for young children with ASD: Results from a pilot RCT of the PRISM model. *Research in Autism Spectrum Disorders*, 71, 101497. <https://doi.org/10.1016/j.rasd.2019.101497>
- Baxendale, J., & Hesketh, A. (2003). Comparison of the effectiveness of the Hanen Parent Programme and traditional clinic therapy. *International Journal of Language & Communication Disorders*, 38(4), 397–415. <https://doi.org/10.1080/1368282031000121651>
- \*Bigelow, K. M., Walker, D., Jia, F., Irvin, D., & Turcotte, A. (2020). Text messaging as an enhancement to home visiting: Building parents' capacity to improve child language-learning environments. *Early Childhood Research Quarterly*, 51, 416–429. <https://doi.org/10.1016/j.ecresq.2019.12.010>
- \*Boyce, L. K., Seedall, R. B., Innocenti, M. S., Roggman, L. A., Cook, G. A., Hagman, A. M., & Norman, V. K. (2017). Influence of a parent-child interaction focused bookmaking approach on maternal parenting self-efficacy. *Infants & Young Children*, 30(1), 76–93. <https://doi.org/10.1097/IYC.0000000000000085>
- Braiden, H. J., McDaniel, B., McCrudden, E., Janes, M., & Crozier, B. (2012). A practice-based evaluation of Barnardo's Forward Steps Early Intervention Programme for children diagnosed with autism. *Child Care in Practice*, 18(3), 227–242. <https://doi.org/10.1080/13575279.2012.683773>
- Brian, J. A., Smith, I. M., Zwaigenbaum, L., Roberts, W., Bryson, S. E., & Baranek, B. (2016). The social ABCs caregiver-mediated intervention for toddlers with autism spectrum disorder: Feasibility, acceptability, and evidence of promise from a multisite study. *Autism Research*, 9(8), 899–912. <https://doi.org/http://dx.doi.org/10.1002/aur.1582>
- Carter, A. S., Messinger, D. S., Stone, W. L., Celimli, S., Nahmias, A. S., & Yoder, P. (2011). A randomized controlled trial of Hanen's 'More Than Words' in toddlers with early autism symptoms. *Journal of Child Psychology and Psychiatry*, 52(7), 741–752. <https://doi.org/10.1111/j.1469-7610.2011.02395.x>
- Casenhiser, D. M., Shanker, S. G., Stieben, J. (2013). Learning through interaction in children with autism: Preliminary data from a social-communication-based intervention. *Autism*, 17(2), 220–241. <https://doi.org/10.1177/1362361311422052>

- Ciccone, N., Hennessey, N., & Stokes, S. F. (2012). Community-based early intervention for language delay: A preliminary investigation. *International Journal of Language & Communication Disorders*, 47(4), 467–470. <https://doi.org/10.1111/j.1460-6984.2012.00149.x>
- Cycyk, L. M., Moore, H. W., De Anda, S., Huerta, L., Méndez, S., Patton, C., & Bourret, C. (2020). Adaptation of a caregiver-implemented naturalistic communication intervention for Spanish-speaking families of Mexican immigrant descent: A promising start. *American Journal of Speech-Language Pathology*, 29(3), 1260–1282. [https://doi.org/10.1044/2020\\_AJSLP-19-00142](https://doi.org/10.1044/2020_AJSLP-19-00142)
- Falkus, G., Tilley, C., Thomas, C., Hockey, H., Kennedy, A., Arnold, T., Thorburn, B., Jones, K., Patel, B., Pimenta, C., Shah, R., Tweedie, F., O'Brien, F., Leahy, R., & Pring, T. (2016). Assessing the effectiveness of parent-child interaction therapy with language delayed children: A clinical investigation. *Child Language Teaching and Therapy*, 32(1), 7–17. <https://doi.org/10.1177/0265659015574918>
- Fey, M. E., Warren, S. F., Brady, N., Finestack, L. H., Bredin-Oja, S. L., Fairchild, M., Sokol, S., & Yoder, P. J. (2006). Early effects of responsivity education/prelinguistic milieu teaching for children with developmental delays and their parents. *Journal of Speech, Language, and Hearing Research*, 49(3), 526–547. [https://doi.org/10.1044/1092-4388\(2006/039\)](https://doi.org/10.1044/1092-4388(2006/039))
- Fey, M. E., Yoder, P. J., Warren, S. F., & Bredin-Oja, S. L. (2013). Is more better? Milieu communication teaching in toddlers with intellectual disabilities. *Journal of Speech, Language, and Hearing Research*, 56(2), 679–693. [https://doi.org/10.1044/1092-4388\(2012/12-0061\)](https://doi.org/10.1044/1092-4388(2012/12-0061))
- \*Gengoux, G. W., Schapp, S., Burton, S., Ardel, C. M., Libove, R. A., Baldi, G., Berquist, K. L., Phillips, J. M., & Hardan, A. Y. (2019). Effects of a parent-implemented developmental reciprocity treatment program for children with autism spectrum disorder. *Autism*, 23(3), 713–725. <https://doi.org/10.1177/1362361318775538>
- Gibbard, D., & Smith, C. (2016). A transagency approach to enabling access to parent-based intervention for language delay in areas of social disadvantage: A service evaluation. *Child Language Teaching and Therapy*, 32(1), 19–33. <https://doi.org/10.1177/0265659014567785>
- Girolametto, L., Pearce, P. S., & Weitzman, E. (1996). Interactive focused stimulation for toddlers with expressive vocabulary delays. *Journal of Speech & Hearing Research*, 39(6), 1274–1283. <https://doi.org/10.1044/jshr.3906.1274>
- Girolametto, L., Weitzman, E., & Clements-Baartman, J. (1998). Vocabulary intervention for children with Down syndrome: Parent training using focused stimulation. *Infant-Toddler Intervention*, 8(2), 109–125.
- Girolametto, L. E. (1988). Improving the social-conversational skills of developmentally delayed children: An intervention study. *Journal of Speech & Hearing Disorders*, 53(2), 156–167. <https://doi.org/10.1044/jshd.5302.156>
- Green, J., Charman, T., McConachie, H., Aldred, C., Slonims, V., Howlin, P., Le Couteur, A., Leadbitter, K., Hudry, K., Byford, S., Barrett, B., Temple, K., Macdonald, W., Pickles, A., & PACT Consortium. (2010). Parent-mediated communication-focused treatment in children with autism (PACT): A randomised controlled trial. *Lancet*, 375(9732), 2152–2160. [https://doi.org/10.1016/S0140-6736\(10\)60587-9](https://doi.org/10.1016/S0140-6736(10)60587-9)
- Hampton, L. H., Kaiser, A. P., & Fuller, E. A. (2020). Multi-component communication intervention for children with autism: A randomized controlled trial. *Autism*, 24(8), 2104–2116. <https://doi.org/10.1177/1362361320934558>

- Ingersoll, B., Wainer, A. L., Berger, N. I., Pickard, K. E., & Bonter, N. (2016). Comparison of a self-directed and therapist-assisted telehealth parent-mediated intervention for children with ASD: A pilot RCT. *Journal of Autism and Developmental Disorders*, 46(7), 2275–2284. <https://doi.org/10.1007/s10803-016-2755-z>
- Ingersoll, B. R., & Wainer, A. L. (2013). Pilot study of a school-based parent training program for preschoolers with ASD. *Autism*, 17(4), 434–448. <https://doi.org/10.1177/1362361311427155>
- Iven, C. J., Albritton, E. G., Eaton, B. B., & Montague, J. C. (1989). A pilot study on the effect of training parents of language-delayed children in pragmatic interaction strategies. *Perceptual and Motor Skills*, 69(1), 295–303. <https://doi.org/10.2466/pms.1989.69.1.295>
- Kaiser, A. P., & Roberts, M. Y. (2013). Parent-implemented enhanced milieu teaching with preschool children who have intellectual disabilities. *Journal of Speech, Language, and Hearing Research*, 56(1), 295–309. [https://doi.org/10.1044/1092-4388\(2012/11-0231\)](https://doi.org/10.1044/1092-4388(2012/11-0231))
- Kot, A., & Law, J. (1995). Intervention with preschool children with specific language impairments: A comparison of two different approaches to treatment. *Child Language Teaching and Therapy*, 11(2), 144–162. <https://doi.org/10.1177/026565909501100202>
- Liu, X., & Schertz, H. H. (2021). Parents outcomes of parent-mediated intervention for toddlers with autism. *Topics in Early Childhood Special Education*, 02711214211019117. <https://doi.org/10.1177/02711214211019117>
- Mahoney, G., & Powell, A. (1988). Modifying parent-child interaction: Enhancing the development of handicapped children. [Special issue]. *Early Intervention for Infants with Handicaps and Their Families*, 22(1), 82–96. <https://doi.org/10.1177/002246698802200110>
- Matthews, N. L., Orr, B. C., Harris, B., McIntosh, R., Openden, D., & Smith, C. J. (2018). Parent and child outcomes of JumpStart™, an education and training program for parents of children with autism spectrum disorder. *Research in Autism Spectrum Disorders*, 56, 21–35. <https://doi.org/10.1016/j.rasd.2018.08.009>
- \*McConachie, H., Randle, V., Hammal, D., & Le Couteur, A. (2005). A controlled trial of a training course for parents of children with suspected autism spectrum disorder. *The Journal of Pediatrics*, 147(3), 335–340. <https://doi.org/10.1016/j.jpeds.2005.03.056>
- McDade, A., & McCarten, P. (1998). "Partnership with parents" A pilot project. *International Journal of Language & Communication Disorders*, 33(Suppl.), 556–561. <https://doi.org/10.3109/13682829809179485>
- McGarry, E., Vernon, T., & Baktha, A. (2020). Brief report: A pilot online pivotal response treatment training program for parents of toddlers with autism spectrum disorder. *Journal of Autism and Developmental Disorders*, 50(9), 3424–3431. <https://doi.org/10.1007/s10803-019-04100-2>
- \*Meadan, H., Adams, N. B., Hacker, R. E., Ramos-Torres, S., & Fanta, A. (2020). Supporting Spanish-speaking families with children with disabilities: Evaluating a training and coaching program. *Journal of Developmental and Physical Disabilities*, 32(3), 489–507. <https://doi.org/10.1007/s10882-019-09704-1>
- Minjarez, M. B., Williams, S. E., Mercier, E. M., & Hardan, A. Y. (2011). Pivotal response group treatment program for parents of children with autism. *Journal of Autism and Developmental Disorders*, 41(1), 92–101. <https://doi.org/10.1007/s10803-010-1027-6>

- Noyan Erbas, A., Ozcebe, E., & Cak Esen, T. (2020). Investigation of the effect of Hanen's "More Than Words" on parental self-efficacy, emotional states, perceived social support, and on communication skills of children with ASD. *Logopedics, Phoniatrics, Vocology*, 1–11. <https://doi.org/10.1080/14015439.2020.1717601>
- Pearce, P. S., Girolametto, L., & Weitzman, E. (1996). The effects of focused stimulation intervention on mothers of late-talking toddlers. *Infant-Toddler Intervention*, 6(3), 213–227.
- Pennington, L., Thomson, K., James, P., Martin, L., & McNally, R. (2009). Effects of It Takes Two to Talk—The Hanen Program for Parents of Preschool Children With Cerebral Palsy: Findings from an exploratory study. *Journal of Speech, Language, and Hearing Research*, 52(5), 1121–1138. [https://doi.org/10.1044/1092-4388\(2009/07-0187\)](https://doi.org/10.1044/1092-4388(2009/07-0187))
- Rajesh, V., & Venkatesh, L. (2019). Preliminary evaluation of a low-intensity parent training program on speech-language stimulation for children with language delay. *International Journal of Pediatric Otorhinolaryngology*, 122, 99–104. <https://doi.org/10.1016/j.ijporl.2019.03.034>
- Roberts, M. Y., & Kaiser, A. P. (2015). Early intervention for toddlers with language delays: A randomized controlled trial. *Pediatrics*, 135(4), 686–693. <https://doi.org/10.1542/peds.2014-2134>
- Roberts, M. Y., & Kaiser, A. (2012). Assessing the effects of a parent-implemented language intervention for children with language impairments using empirical benchmarks: A pilot study. *Journal of Speech, Language, and Hearing Research*, 55(6), 1655–1670. [https://doi.org/10.1044/1092-4388\(2012/11-0236\)](https://doi.org/10.1044/1092-4388(2012/11-0236))
- Rogers, S. J., Estes, A., Vismara, L., Munson, J., Zierhut, C., Greenson, J., Dawson, G., Rocha, M., Sugar, C., Senturk, D., Whelan, F., & Talbott, M. (2019). Enhancing low-intensity coaching in parent implemented Early Start Denver Model intervention for early autism: A randomized comparison treatment trial. *Journal of Autism and Developmental Disorders*, 49(2), 632–646. <https://doi.org/10.1007/s10803-018-3740-5>
- Rollins, P. R., John, S., Jones, A., & De Froy, A. (2019). Pathways Early ASD Intervention as a moderator of parenting stress on parenting behaviors: A randomized control trial. *Journal of Autism and Developmental Disorders*, 49(10), 4280–4293. <https://doi.org/10.1007/s10803-019-04144-4>
- Romski, M., Sevcik, R. A., Adamson, L. B., Cheslock, M., Smith, A., Barker, R. M., & Bakeman, R. (2010). Randomized comparison of augmented and non-augmented language interventions for toddlers with developmental delays and their parents. *Journal of Speech, Language, and Hearing Research*, 53(2), 350–364. [https://doi.org/10.1044/1092-4388\(2009/08-0156\)](https://doi.org/10.1044/1092-4388(2009/08-0156))
- Sengupta, K., Mahadik, S., & Kapoor, G. (2020). Glocalizing project ImPACT: Feasibility, acceptability and preliminary outcomes of a parent-mediated social communication intervention for autism adapted to the Indian context. *Research in Autism Spectrum Disorders*, 76, 101585. <https://doi.org/10.1016/j.rasd.2020.101585>
- \*Stadnick, N. A., Stahmer, A., & Brookman-Frazee, L. (2015). Preliminary effectiveness of project ImPACT: A parent-mediated intervention for children with autism spectrum disorder delivered in a community program. *Journal of Autism and Developmental Disorders*, 45(7), 2092–2104. <https://doi.org/10.1007/s10803-015-2376-y>
- Stahmer, A. C., Rieth, S. R., Dickson, K. S., Feder, J., Burgeson, M., Searcy, K., & Brookman-Frazee, L. (2020). Project ImPACT for Toddlers: Pilot outcomes of a community adaptation of an intervention for autism risk. *Autism*, 24(3), 617–632. <https://doi.org/10.1177/1362361319878080>

- Suttora, C., Zuccarini, M., Aceti, A., Corvaglia, L., Guarini, A., & Sansavini, A. (2021). The effects of a parent-implemented language intervention on late-talkers' expressive skills: The mediational role of parental speech contingency and dialogic reading abilities. *Frontiers in Psychology*, 3645. <https://doi.org/10.3389/fpsyg.2021.723366>
- Tannock, R., Girolametto, L., & Siegel, L. S. (1992). Language intervention with children who have developmental delays: Effects of an interactive approach. [Special Issue]. *The Relation of Communication and Language Development to Mental Retardation*, 97(2), 145–160.
- \*Towson, J. A., Gallagher, P. A., & Bingham, B. (2014). Training Head Start parents in dialogic reading to improve outcomes for children. *International Journal of Child Health and Human Development*, 7(3), 287–296.
- \*Tsybina, I., & Eriks-Brophy, A. (2010). Bilingual dialogic book-reading intervention for preschoolers with slow expressive vocabulary development. *Journal of Communication Disorders*, 43(6), 538–556. <https://doi.org/10.1016/j.jcomdis.2010.05.006>
- Venker, C. E., McDuffie, A., Weismer, S. E., & Abbeduto, L. (2012). Increasing verbal responsiveness in parents of children with autism: A pilot study. *Autism*, 16(6), 568–585. <https://doi.org/10.1177/1362361311413396>
- \*Wake, M., Tobin, S., Girolametto, L., Ukoumunne, O. C., Gold, L., Levickis, P., Sheehan, J., Goldfeld, S., & Reilly, S. (2011). Outcomes of population based language promotion for slow to talk toddlers at ages 2 and 3 years: Let's Learn Language cluster randomised controlled trial. *BMJ*, 343(7821), 1–10. <https://doi.org/10.1136/bmj.d4741>
- Weistuch, L., Lewis, M., & Sullivan, M. W. (1991). Use of a language interaction intervention in the preschools. *Journal of Early Intervention*, 15(3), 278–287. <https://doi.org/10.1177/105381519101500307>
- Yang, Y.-H. (2016). Parents and young children with disabilities: The effects of a home-based music therapy program on parent-child interactions. *Journal of Music Therapy*, 53(1), 27–54. <https://doi.org/10.1093/jmt/thv018>
- Yoder, P. J., & Warren, S. F. (2002). Effects of prelinguistic milieu teaching and parent responsivity education on dyads involving children with intellectual disabilities. *Journal of Speech, Language, and Hearing Research*, 45(6), 1158–1174. [https://doi.org/10.1044/1092-4388\(2002/094\)](https://doi.org/10.1044/1092-4388(2002/094))
