# Supplementary material
Source: publisher figshare collection journal article supplement (https://asha.figshare.com/articles/dataset/_/20289195)
Supplement: Supplementary file 8 [file 1]

## Supplemental Material S2. Search strategies.

**Searches completed and updated:** May 21, 2019, August 24, 2020, and November 17, 2021.

### APA PsycInfo (OVID)

1. (("speech development" or "language development" or "expressive language" or "receptive language" or "vocabulary\*" or "Language Success") and (mother\* or parent\* or father\* or family or familial or families or caregiver\*)).tw.
2. ((mother\* or parent\* or father\* or family or familial or families or caregiver\*) adj10 ("Language input\*" or "linguistic input\*" or "verbal input\*" or "language environment" or "child-directed speech" or "directive communication\*" or "variation\* in language" or "responsive input\*" or responsivity or directiveness)).tw.
3. ("Maternal input\*" or "paternal input\*" or "maternal directive" or "maternal responsive" or "paternal responsive" or "paternal directive" or "maternal language measure\*" or "paternal language measure\*").tw.
4. 1 or 2 or 3
5. exp Parenting skills/ or exp Parent training/ or exp Parenting/
6. exp Parents/ or (exp Caregivers/ and (exp Family members/ or exp Family/ or (family or familial or grandparent\* or sibling\* or brother\* or sister\* or aunt\* or uncle\*))).tw.
7. exp Language development/ or Communication/ or Natural language/ or exp Augmentative communication/ or exp Verbal communication/ or exp Nonverbal communication/ or Reading/ or Oral reading/
8. (5 or 6) and 7
9. 4 or 8
10. (Hanan or LENA or Program\* or Educat\* or interact\* or strateg\* or "parents as teachers" or training# or treatment or interven\*).tw.
11. (8 or 9) and 10
12. limit 11 to (all journals and english language)
13. (babies or baby\* or infanc\* or infant\* or toddler\*).tw.
14. 12 and 13
15. limit 12 to (120 neonatal or 140 infancy <2 to 23 mo> or 160 preschool age )
16. 14 or 15
17. limit 16 to ("0300 clinical trial" or 1800 quantitative or 2100 treatment outcome)
18. exp program evaluation/ or exp treatment effectiveness evaluation/ or treatment outcome.md. or (interven\* or "parenting program\*").tw.
19. 16 and 18
20. 17 or 19
21. animal.po.
22. human.po.
23. 21 not 22
24. 20 not 23

### MEDLINE (Ovid)

Ovid MEDLINE(R) and Epub Ahead of Print, In-Process & Other Non-Indexed Citations, Daily and Versions(R)

1. (("speech development" or "expressive language" or "receptive language" or "vocabulary\*" or "Language Success" or "language development" or "language impairment") and (mother\* or parent\* or father\* or family or familial or families or caregiver\*)).tw.
2. ((mother\* or parent\* or father\* or family or familial or families or caregiver\*) adj10 ("Language input\*" or "linguistic input\*" or "verbal input\*" or "language environment" or "child-directed speech" or "directive communication\*" or "variation\* in language" or "responsive input\*" or responsivity or directiveness)).tw.
3. ("Maternal input\*" or "paternal input\*" or "maternal directive" or "maternal responsive" or "paternal responsive" or "paternal directive" or "maternal language measure\*" or "paternal language measure\*").tw.
4. 1 or 2 or 3
5. exp Family Relations/

6. exp Parents/ or exp Grandparents/ or exp Legal guardians/
7. exp Caregivers/ and (family or familial or grandparent\* or sibling\* or brother\* or sister\* or aunt\* or uncle\*).tw.
8. 5 or 6 or 7
9. exp Language development/ or exp Language development disorders/ or Speech disorders/ or communication aids for disabled/ or exp communication/ or exp nonverbal communication/ or reading/ or speech/
10. 8 and 9
11. 4 or 10
12. (Hanan or LENA or Program\* or Educat\* or interact\* or strateg\* or "parents as teachers" or training# or treatment or interven\*).tw.
13. 11 and 12
14. (baby\* or babies or infanc\* or infant\* or toddler\* or preschool\* or child or children).tw.
15. 13 and 14
16. limit 13 to ("all infant (birth to 23 months)" or "preschool child (2 to 5 years)")
17. 15 or 16
18. exp "clinical studies as topic"/
19. exp "evaluation studies as topic"/
20. exp clinical study/ or evaluation study/
21. (intervent\* or (parent\* adj2 program)).tw.
22. 18 or 19 or 20 or 21
23. 17 and 22
24. limit 23 to ("child (6 to 12 years)" or "adolescent (13 to 18 years)")
25. limit 23 to ("all infant (birth to 23 months)" or "preschool child (2 to 5 years)")
26. 24 not 25
27. 27. 23 not 26
28. limit 27 to (afrikaans or albanian or arabic or armenian or azerbaijani or belorussian or bengali or bosnian or bulgarian or burmese or catalan or chinese or croatian or czech or danish or dutch or esperanto or estonian or finnish or flemish or french or gaelic, scots or georgian or german or greek or hausa or hebrew or hindi or hungarian or icelandic or indonesian or interlingua or italian or japanese or kirghiz or korean or latin or latvian or lithuanian or macedonian or malay or marathi or masai or multilingual or norwegian or persian or polish or portuguese or pushto or rumanian or russian or serbian or slovak or slovene or spanish or swahili or swedish or tagalog or tamil or telugu or thai or turkish or ukrainian or undetermined or urdu or vietnamese or welsh)
29. limit 27 to english language
30. 28 not 29
31. 27 not 30

#### Linguistics & Language Behavior Abstracts (ProQuest)

1. ti(mother\* or parent\* or father\* or family or familial or families or caregiver\* OR "language environment\*" OR "child-directed speech" OR "maternal directive\*" OR "maternal responsive\*" OR "paternal responsive\*" OR "paternal directive\*" OR "Maternal input\*" OR "paternal input\*" or "maternal directive" or "maternal responsive" or "paternal responsive" or "paternal directive" or "maternal language measure\*" or "paternal language measure\*")
2. ab(mother\* or parent\* or father\* or family or familial or families or caregiver\* OR "language environment\*" OR "child-directed speech" OR "maternal directive\*" OR "maternal responsive\*" OR "paternal responsive\*" OR "paternal directive\*" OR "Maternal input\*" OR "paternal input\*" or "maternal directive" or "maternal responsive" or "paternal responsive" or "paternal directive" or "maternal language measure\*" or "paternal language measure\*")
3. MAINSUBJECT.EXPLODE("Adult Child Interaction")
4. MAINSUBJECT.EXPLODE("Child Directed Speech")
5. 1 OR 2 OR 3 OR 4
6. ti(Hanan or LENA or strateg\* or "parents as teachers" or training# or treatment or interven\*)
7. ab(Hanan or LENA or strateg\* or "parents as teachers" or training# or treatment or interven\*)
8. MAINSUBJECT.EXPLODE("Quantitative Analysis")

9. 6 OR 7 OR 8
10. ti(babies OR baby\* OR infanc\* OR infant\* OR toddler\*)
11. ab(babies OR baby\* OR infanc\* OR infant\* OR toddler\*)
12. MAINSUBJECT.EXPLODE("Infants")
13. 10 OR 11 OR 12
14. 5 AND 9 AND 13

Limit to ---

Source type: Scholarly Journals

Language: English

## Scopus

(((((TITLE-ABS-KEY(Hanen or LENA or Program or Education or strategy or "parents as teachers" or training or treatment or intervention)) AND (TITLE-ABS-KEY(Outcome or evaluation or trial or clinical)) AND ((TITLE-ABS-KEY( ( ( "speech development" OR "language development" OR "natural language" or "expressive language" OR "receptive language" OR vocabulary OR "Language Success" or communication) AND ( mother OR parent OR father) ) ) ) OR (TITLE-ABS-KEY((mother or parent or father or family) w/10 ("Language input" or "linguistic input" or "verbal input" or "language environmen\*" or "child directed speech" or "directive communication\*" or "variation in language" or "responsive input" or responsivity or directiveness))) OR (TITLE-ABS-KEY("Maternal input" or "paternal input" or "maternal directive" or "maternal responsive" or "paternal responsive" or "paternal directive" or "maternal language measure\*" or "paternal language measure")))) AND (TITLE-ABS-KEY(Hanen or LENA or Program or Education or strategy or "parents as teachers" or training or treatment or intervention)) AND (TITLE-ABS-KEY(Outcome or evaluation or trial or clinical))) AND (TITLE-ABS-KEY(infant or baby or toddler or preschooler))) AND (TITLE-ABS-KEY((language OR speech) W/5 (success OR development OR acquisition))) AND ( LIMIT-TO ( SRCTYPE,"j" ) ) AND NOT (TITLE-ABS-KEY(qualitative OR interview OR "focus group")) AND ( LIMIT-TO ( LANGUAGE,"English" ) ) )
