# Supplementary material
Source: publisher figshare collection journal article supplement (https://asha.figshare.com/articles/dataset/_/20289195)
Supplement: Supplementary file 9 [file 1]

| Study                          | Caregiver-Child Language Intervention Name                                          | Group Sample Size | Mean Child Age at Enrollment (Months) | Child Characteristics                                                                                                            | Child Gender       | Caregiver Relationship                   | Mean Caregiver Age (Years) | Targeted Caregiver Characteristics                          | Family Race |
|--------------------------------|-------------------------------------------------------------------------------------|-------------------|---------------------------------------|----------------------------------------------------------------------------------------------------------------------------------|--------------------|------------------------------------------|----------------------------|-------------------------------------------------------------|-------------|
| <i>0 through 11 months</i>     |                                                                                     |                   |                                       |                                                                                                                                  |                    |                                          |                            |                                                             |             |
| <b>Developmental Disorder</b>  |                                                                                     |                   |                                       |                                                                                                                                  |                    |                                          |                            |                                                             |             |
| Barrera et al., 1987           | a. Home Responsive Intervention                                                     | 19                | 4                                     | DS                                                                                                                               | M = 47%<br>F = 53% | Mother                                   | 28.5                       | -                                                           | -           |
| <i>12 through 23 months</i>    |                                                                                     |                   |                                       |                                                                                                                                  |                    |                                          |                            |                                                             |             |
| <b>Language Delay/Disorder</b> |                                                                                     |                   |                                       |                                                                                                                                  |                    |                                          |                            |                                                             |             |
| Armstrong, 1998                | a. Storybooks to Literacy                                                           | 30                | 20                                    | DD;<br>language delay;<br>otitis media;<br>articulation disorder;<br>prematurity;<br>unspecified adverse effect of drug exposure | -                  | Parent;<br>Grandparent;<br>Foster parent | -                          | Single Parent Home,<br>Medically or Environmentally At-risk | -           |
| Bigelow et al., 2020           | a. Promoting Communication Tools for Advancing Language in Kids with Text Messaging | 69                | 18                                    | participating in home visiting or early intervention program (e.g., Early Head Start, Part C IDEA)                               | -                  | Parent                                   | -                          | -                                                           | -           |
|                                | b. Promoting Communication Tools for Advancing Language in Kids with Text Messaging | 58                | 18                                    | participating in home visiting or early intervention program (e.g., Early Head Start, Part C IDEA)                               | -                  | Parent                                   | -                          | -                                                           | -           |
| Wake et al., 2011              | a. You Make the Difference                                                          | 158               | 18.1                                  | language delay                                                                                                                   | M = 52%<br>F = 48% | Parent                                   | -                          | -                                                           | -           |
| <i>24 through 35 months</i>    |                                                                                     |                   |                                       |                                                                                                                                  |                    |                                          |                            |                                                             |             |
| <b>Language Delay/Disorder</b> |                                                                                     |                   |                                       |                                                                                                                                  |                    |                                          |                            |                                                             |             |
| Boyce et al., 2017             | a. Family-Centered Bookmaking                                                       | 48                | 24.63                                 | speech delay;<br>receiving Part C Services                                                                                       | M = 77%<br>F = 23% | Mother                                   | 31.3                       | -                                                           | -           |
| Tsybina & Eriks-Brophy, 2010   | a. Bilingual Dialogic Book-Reading Intervention                                     | 6                 | 27.8                                  | DD;<br>parental concern about language development in both English and Spanish, bilingual                                        | M = 83%<br>F = 17% | Mother                                   | 34.5                       | -                                                           | -           |
| <i>36 through 48 months</i>    |                                                                                     |                   |                                       |                                                                                                                                  |                    |                                          |                            |                                                             |             |
| <b>Autism</b>                  |                                                                                     |                   |                                       |                                                                                                                                  |                    |                                          |                            |                                                             |             |

|                                     |                                                                 |    |       |                               |                    |                   |       |                                                      |                                            |
|-------------------------------------|-----------------------------------------------------------------|----|-------|-------------------------------|--------------------|-------------------|-------|------------------------------------------------------|--------------------------------------------|
| <b>Gengoux et al., 2019</b>         | a. Developmental Reciprocity Treatment                          | 22 | 44.6  | autism                        | M = 82%<br>F = 18% | Parent            | 37.33 | -                                                    | -                                          |
| <b>McConachie et al., 2005</b>      | a. Hanen More Than Words                                        | 26 | 38.12 | DD;<br>autism                 | M = 81%<br>F = 19% | Mother;<br>Father | -     | -                                                    | -                                          |
| <b>Meaden et al., 2020</b>          | a. Parent-implemented Communication Strategies                  | 7  | 44.86 | autism;<br>language delay     | M = 71%<br>F = 29% | Mother            | 35.0  | -                                                    | -                                          |
| <b>Stadnick et al., 2015</b>        | a. Project ImPACT (Improving Parents as Communication Teachers) | 16 | 46.75 | autism (confirmed or at-risk) | M = 81%<br>F = 19% | Parent            | 34.8  | -                                                    | -                                          |
| <b>Language Delay/Disorder</b>      |                                                                 |    |       |                               |                    |                   |       |                                                      |                                            |
| <b>Towson &amp; Gallagher, 2014</b> | a. Read Together, Talk Together                                 | 13 | 46.54 | TD;<br>DD                     | M = 38%<br>F = 62% | Mother;<br>Father | -     | Low-income;<br>Parent of a<br>Child in Head<br>Start | Black = 15%<br>White = 54%<br>Latino = 31% |

*Note.* DD = developmental delay; DS = Down syndrome; TD = typical development; F = female; M = male
